# Supplementary material for: Structural Covariance Network of Cortical Gyrification in Benign Childhood Epilepsy with Centrotemporal Spikes
Source: Front Neurol. 2018 Feb 5;9:10. doi: 10.3389/fneur.2018.00010 (PMC5807981; doi:10.3389/fneur.2018.00010)
Supplement: Supplementary file 3 [file Data_Sheet_1.xlsx]

## Sheet: Sheet1
ROI label	Name
ROI001	lG_and_S_frontomargin
ROI002	rG_and_S_frontomargin
ROI003	lG_and_S_occipital_inf
ROI004	rG_and_S_occipital_inf
ROI005	lG_and_S_paracentral
ROI006	rG_and_S_paracentral
ROI007	lG_and_S_subcentral
ROI008	rG_and_S_subcentral
ROI009	lG_and_S_transv_frontopol
ROI010	rG_and_S_transv_frontopol
ROI011	lG_and_S_cingul-Ant
ROI012	rG_and_S_cingul-Ant
ROI013	lG_and_S_cingul-Mid-Ant
ROI014	rG_and_S_cingul-Mid-Ant
ROI015	lG_and_S_cingul-Mid-Post
ROI016	rG_and_S_cingul-Mid-Post
ROI017	lG_cingul-Post-dorsal
ROI018	rG_cingul-Post-dorsal
ROI019	lG_cingul-Post-ventral
ROI020	rG_cingul-Post-ventral
ROI021	lG_cuneus
ROI022	rG_cuneus
ROI023	lG_front_inf-Opercular
ROI024	rG_front_inf-Opercular
ROI025	lG_front_inf-Orbital
ROI026	rG_front_inf-Orbital
ROI027	lG_front_inf-Triangul
ROI028	rG_front_inf-Triangul
ROI029	lG_front_middle
ROI030	rG_front_middle
ROI031	lG_front_sup
ROI032	rG_front_sup
ROI033	lG_Ins_lg_and_S_cent_ins
ROI034	rG_Ins_lg_and_S_cent_ins
ROI035	lG_insular_short
ROI036	rG_insular_short
ROI037	lG_occipital_middle
ROI038	rG_occipital_middle
ROI039	lG_occipital_sup
ROI040	rG_occipital_sup
ROI041	lG_oc-temp_lat-fusifor
ROI042	rG_oc-temp_lat-fusifor
ROI043	lG_oc-temp_med-Lingual
ROI044	rG_oc-temp_med-Lingual
ROI045	lG_oc-temp_med-Parahip
ROI046	rG_oc-temp_med-Parahip
ROI047	lG_orbital
ROI048	rG_orbital
ROI049	lG_pariet_inf-Angular
ROI050	rG_pariet_inf-Angular
ROI051	lG_pariet_inf-Supramar
ROI052	rG_pariet_inf-Supramar
ROI053	lG_parietal_sup
ROI054	rG_parietal_sup
ROI055	lG_postcentral
ROI056	rG_postcentral
ROI057	lG_precentral
ROI058	rG_precentral
ROI059	lG_precuneus
ROI060	rG_precuneus
ROI061	lG_rectus
ROI062	rG_rectus
ROI063	lG_subcallosal
ROI064	rG_subcallosal
ROI065	lG_temp_sup-G_T_transv
ROI066	rG_temp_sup-G_T_transv
ROI067	lG_temp_sup-Lateral
ROI068	rG_temp_sup-Lateral
ROI069	lG_temp_sup-Plan_polar
ROI070	rG_temp_sup-Plan_polar
ROI071	lG_temp_sup-Plan_tempo
ROI072	rG_temp_sup-Plan_tempo
ROI073	lG_temporal_inf
ROI074	rG_temporal_inf
ROI075	lG_temporal_middle
ROI076	rG_temporal_middle
ROI077	lLat_Fis-ant-Horizont
ROI078	rLat_Fis-ant-Horizont
ROI079	lLat_Fis-ant-Vertical
ROI080	rLat_Fis-ant-Vertical
ROI081	lLat_Fis-post
ROI082	rLat_Fis-post
ROI083	lPole_occipital
ROI084	rPole_occipital
ROI085	lPole_temporal
ROI086	rPole_temporal
ROI087	lS_calcarine
ROI088	rS_calcarine
ROI089	lS_central
ROI090	rS_central
ROI091	lS_cingul-Marginalis
ROI092	rS_cingul-Marginalis
ROI093	lS_circular_insula_ant
ROI094	rS_circular_insula_ant
ROI095	lS_circular_insula_inf
ROI096	rS_circular_insula_inf
ROI097	lS_circular_insula_sup
ROI098	rS_circular_insula_sup
ROI099	lS_collat_transv_ant
ROI100	rS_collat_transv_ant
ROI101	lS_collat_transv_post
ROI102	rS_collat_transv_post
ROI103	lS_front_inf
ROI104	rS_front_inf
ROI105	lS_front_middle
ROI106	rS_front_middle
ROI107	lS_front_sup
ROI108	rS_front_sup
ROI109	lS_interm_prim-Jensen
ROI110	rS_interm_prim-Jensen
ROI111	lS_intrapariet_and_P_trans
ROI112	rS_intrapariet_and_P_trans
ROI113	lS_oc_middle_and_Lunatus
ROI114	rS_oc_middle_and_Lunatus
ROI115	lS_oc_sup_and_transversal
ROI116	rS_oc_sup_and_transversal
ROI117	lS_occipital_ant
ROI118	rS_occipital_ant
ROI119	lS_oc-temp_lat
ROI120	rS_oc-temp_lat
ROI121	lS_oc-temp_med_and_Lingual
ROI122	rS_oc-temp_med_and_Lingual
ROI123	lS_orbital_lateral
ROI124	rS_orbital_lateral
ROI125	lS_orbital_med-olfact
ROI126	rS_orbital_med-olfact
ROI127	lS_orbital-H_Shaped
ROI128	rS_orbital-H_Shaped
ROI129	lS_parieto_occipital
ROI130	rS_parieto_occipital
ROI131	lS_pericallosal
ROI132	rS_pericallosal
ROI133	lS_postcentral
ROI134	rS_postcentral
ROI135	lS_precentral-inf-part
ROI136	rS_precentral-inf-part
ROI137	lS_precentral-sup-part
ROI138	rS_precentral-sup-part
ROI139	lS_suborbital
ROI140	rS_suborbital
ROI141	lS_subparietal
ROI142	rS_subparietal
ROI143	lS_temporal_inf
ROI144	rS_temporal_inf
ROI145	lS_temporal_sup
ROI146	rS_temporal_sup
ROI147	lS_temporal_transverse
ROI148	rS_temporal_transverse
